# Supplementary material
Source: PubMed Central journal article supplement (PMC4046732)
Supplement: CJN.09730913_CJN09730913SupplementaryData.pdf [file CJN.09730913_CJN09730913SupplementaryData.pdf]

**Patrick G Lan M Clin Epid<sup>1,2,3</sup>, David W Johnson PhD<sup>4,5</sup>, Stephen P McDonald PhD<sup>1,6,7</sup>, Neil Boudville MB BS<sup>8</sup>, Monique Borlace MN<sup>6</sup>, Sunil V Badve MD<sup>4</sup>, Kamal Sud MD<sup>3,9</sup>, Philip A Clayton MM (Clin Epi)<sup>1,2,3</sup>**

<sup>1</sup>Australia and New Zealand Dialysis and Transplant (ANZDATA) Registry, Adelaide, Australia; <sup>2</sup> Department of Renal Medicine, Royal Prince Alfred Hospital, Sydney, Australia; <sup>3</sup> Sydney Medical School, University of Sydney, Sydney, Australia; <sup>4</sup> Department of Nephrology, University of Queensland at Princess Alexandra Hospital, Brisbane, Australia, <sup>5</sup> Translational Research Institute, Brisbane, Australia; <sup>6</sup> Central Northern Adelaide Renal and Transplantation Service, Royal Adelaide Hospital, Adelaide, Australia; <sup>7</sup> Discipline of Medicine, University of Adelaide, Adelaide, Australia; <sup>8</sup> School of Medicine and Pharmacology, University of Western Australia, Perth, Australia; <sup>9</sup> Departments of Renal Medicine, Nepean and Westmead Hospitals, Sydney, Australia
